# Supplementary material
Source: PubMed Central journal article supplement (PMC9839389)
Supplement: 12630_2022_2386_MOESM1_ESM.pdf [file 12630_2022_2386_MOESM1_ESM.pdf]

Supplementary Tables

Supplementary Table 1: Baseline Characteristics and Outcomes for DVT-prophylaxis only versus UFH cohorts of ECMO patients

| Characteristics             | DVT prophylaxis only<br>(n = 42) | UFH<br>(n = 135)    | P value | SMD   |
|-----------------------------|----------------------------------|---------------------|---------|-------|
| Age (yr), median [IQR]      | 59.00 [45.00–68.75]              | 55.00 [43.50–64.50] | 0.26    | 0.17  |
| Female, n (%)               | 16 (38%)                         | 36 (27%)            | 0.18    | 0.25  |
| <b>Past medical history</b> |                                  |                     |         |       |
| Atrial fibrillation         | 12 (29%)                         | 11 (8%)             | 0.001   | 0.55  |
| Heart failure               | 8 (19%)                          | 26 (19%)            | 1       | 0.005 |
| CKD                         | 1 (2%)                           | 14 (10%)            | 0.12    | 0.33  |
| COPD                        | 1 (2%)                           | 4 (3%)              | 1       | 0.04  |
| ILD                         | 1 (2%)                           | 1 (1%)              | 0.42    | 0.13  |
| CVA                         | 8 (19%)                          | 13 (10%)            | 0.11    | 0.27  |
| DLD                         | 22 (52%)                         | 42 (31%)            | 0.02    | 0.44  |
| DM                          | 14 (33%)                         | 34 (25%)            | 0.32    | 0.18  |
| GIB                         | 0 (0%)                           | 1 (1%)              | 1       | 0.17  |
| HTN                         | 21 (50%)                         | 57 (42%)            | 0.38    | 0.16  |
| PVD                         | 2 (5%)                           | 3 (2%)              | 0.34    | 0.14  |
| Previous cardiac surgery    | 8 (19%)                          | 38 (28%)            | 0.32    | 0.22  |
| Smoking (current)           | 4 (10%)                          | 22 (16%)            | 0.60    | 0.20  |
| Smoking (past)              | 12 (29%)                         | 37 (27%)            | 0.60    | 0.20  |
| <b>Precannulation labs</b>  |                                  |                     |         |       |
| PO <sub>2</sub>             | 132 [67–320]                     | 119 [63–294]        | 0.49    | 0.08  |
| PCO <sub>2</sub>            | 44 [35–52]                       | 41 [36–50]          | 0.50    | 0.05  |
| Creatinine                  | 120 [90–174]                     | 124 [84–178]        | 0.90    | 0.04  |
| Hematocrit                  | 28 [25–36]                       | 30 [25–36]          | 0.87    | 0.02  |
| Sodium                      | 138 [135–147]                    | 140 [137–145]       | 0.7     | 0.003 |
| Potassium                   | 4.4 [3.8–5.5]                    | 4.1 [3.7–4.6]       | 0.03    | 0.45  |
| <b>Home Anticoagulants</b>  |                                  |                     |         |       |
| ASA                         | 16 (38%)                         | 53 (39%)            | 1       | 0.02  |
| NOAC                        | 2 (5%)                           | 2 (2%)              | 0.24    | 0.19  |
| Clopidogrel/ticagrelor      | 4 (10%)                          | 10 (7%)             | 0.74    | 0.08  |
| Warfarin                    | 10 (24%)                         | 14 (10%)            |         |       |
| <b>Type of ECMO</b>         |                                  |                     |         |       |
| VA ECMO                     | 36 (86%)                         | 100 (74%)           | 0.14    | 0.29  |
| VV ECMO                     | 6 (14%)                          | 35 (26%)            | 0.14    | 0.29  |

| <b>MCS indication</b>           |            |           |       |      |
|---------------------------------|------------|-----------|-------|------|
| Cardiac arrest                  | 14 (33%)   | 31 (23%)  | 0.53  | 0.37 |
| Post heart transplant support   | 5 (12%)    | 17 (13%)  |       |      |
| Postcardiotomy                  | 13 (31%)   | 48 (36%)  |       |      |
| Respiratory failure             | 7 (17%)    | 34 (25%)  |       |      |
| Post PCI                        | 1 (2%)     | 2 (2%)    |       |      |
| Toxicologic overdose            | 0 (0%)     | 1 (1%)    |       |      |
| Hypothermic rewarm              | 1 (2%)     | 1 (1%)    |       |      |
| <b>Thrombotic Complications</b> |            |           |       |      |
| LV thrombus                     | 1 (2%)     | 1 (1%)    | 0.42  | 0.13 |
| Clots in circuit                | 9 (21%)    | 38 (28%)  | 0.43  | 0.16 |
| Pump thrombosis                 | 0 (0%)     | 1 (1%)    | 1     | 0.12 |
| Ischemic stroke                 | 2 (5%)     | 1 (1%)    | 0.14  | 0.25 |
| <b>Bleeding complications</b>   |            |           |       |      |
| BARC $\geq$ 2                   | 19 (45%)   | 76 (56%)  | 0.22  | 0.22 |
| Re-exploration for bleeding     | 17 (40%)   | 59 (44%)  | 0.86  | 0.06 |
| Total pRBCs                     | 24 [15–42] | 24 [9–39] | 0.55  | 0.08 |
| <b>Course in hospital</b>       |            |           |       |      |
| Survival to discharge           | 5 (12%)    | 53 (39%)  | 0.001 | 0.66 |

ASA = acetylsalicylic acid; BARC = Bleeding Academic Research Consortium; CKD = chronic kidney disease; COPD = chronic obstructive pulmonary disease; CVA = cerebrovascular accident; DLD = dyslipidemia; DM = diabetes mellitus; DVT = deep vein thrombosis; ECMO = extracorporeal membrane oxygenation; GIB = gastrointestinal bleed; HTN = hypertension; ILD = interstitial lung disease; LOS = length of stay; LV = left ventricle; MCS = mechanical circulatory support; NOAC = non-vitamin K antagonist oral anticoagulant; PCI = percutaneous intervention; pRBCs = packed red blood cells; PVD = peripheral vascular disease; SMD = standardized mean difference; UFH = unfractionated heparin; VA = venoarterial; VV = venovenous
